# Supplementary material for: Maternal milk and fecal microbes guide the spatiotemporal development of mucosa-associated microbiota and barrier function in the porcine neonatal gut
Source: PubMed Central journal article supplement (PMC6921401; doi:10.1186/s12915-019-0729-2), 2019-12-18
Supplement: 12915_2019_729_MOESM2_ESM.pdf [file 12915_2019_729_MOESM2_ESM.pdf]

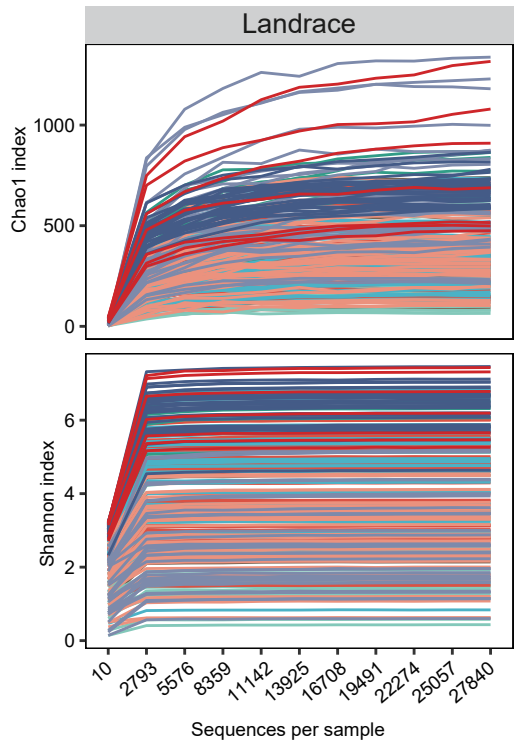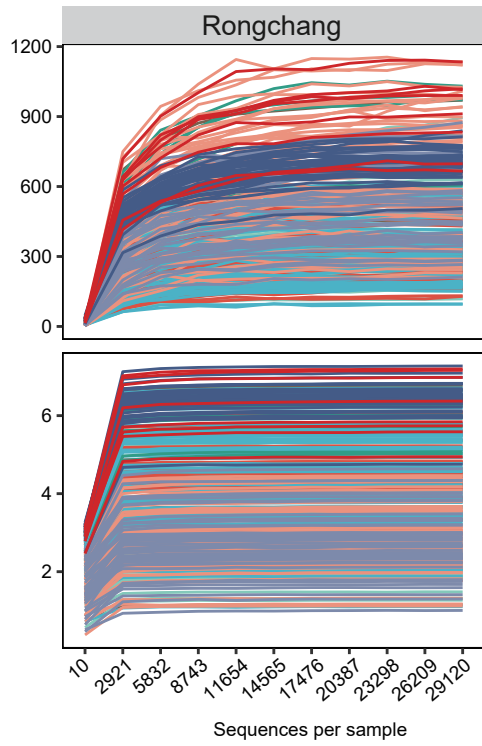

----- Intestinal mucosa -----

— Jejunum — Ileum — Cecum — Colon

----- Microbial sources -----

— Feces — Milk — Skin — Vagina

— Environment
