# Supplementary material for: Maternal milk and fecal microbes guide the spatiotemporal development of mucosa-associated microbiota and barrier function in the porcine neonatal gut
Source: BMC Biol. 2019 Dec 18;17:106. doi: 10.1186/s12915-019-0729-2 (PMC6921401; doi:10.1186/s12915-019-0729-2)
Supplement: Supplementary file 1 — Additional file 1: Figure S1. Experimental design and workflow of sample collection. Each tick denotes a time-point of sample collection. [file 12915_2019_729_MOESM1_ESM.pdf]

|                                                                                                         |                               | Farrowing |   |   |   |   |    | Weaning |    |                                                                                                  |                 |
|---------------------------------------------------------------------------------------------------------|-------------------------------|-----------|---|---|---|---|----|---------|----|--------------------------------------------------------------------------------------------------|-----------------|
|                                                                                                         |                               | -2        | 0 | 1 | 3 | 7 | 14 | 28      | 35 |                                                                                                  |                 |
| <b>Piglets</b>                                                                                          |                               |           |   |   |   |   |    |         |    |                                                                                                  | Sampling method |
| 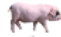<br>Rongchang pig (RP) | Intestinal mucosa             |           | ✓ | ✓ | ✓ | ✓ | ✓  | ✓       | ✓  | 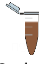<br>2ml tube  |                 |
|                                                                                                         | Intestinal tissue             |           | ✓ | ✓ | ✓ | ✓ | ✓  | ✓       | ✓  |                                                                                                  |                 |
| <b>Sows</b>                                                                                             |                               |           |   |   |   |   |    |         |    |                                                                                                  |                 |
| 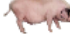<br>RP                 | Feces                         | ✓         |   |   | ✓ | ✓ | ✓  | ✓       |    | 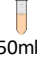<br>50ml tube |                 |
|                                                                                                         | Breast milk                   |           | ✓ | ✓ | ✓ | ✓ | ✓  | ✓       |    |                                                                                                  |                 |
| 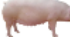<br>LP                 | Areolar skin                  |           | ✓ |   |   |   |    |         |    | 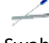<br>Swab      |                 |
|                                                                                                         | Birth canal                   |           | ✓ |   |   |   |    |         |    |                                                                                                  |                 |
| <b>Environment</b>                                                                                      |                               |           |   |   |   |   |    |         |    |                                                                                                  |                 |
|                                                                                                         | Obstetric table and incubator |           | ✓ |   |   |   |    |         |    |                                                                                                  |                 |
